# Supplementary material for: Mixed Metal Oxide W-TiO2 Nanopowder for Environmental Process: Synergy of Adsorption and Photocatalysis
Source: MDPI journal article supplement (doi:10.3390/nano14090765), 2024-04-26
Supplement: s1 [file s1]

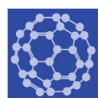

# Mixed Metal Oxide W-TiO<sub>2</sub> Nanopowder for Environmental Process: Synergy of Adsorption and Photocatalysis

Khley Cheng <sup>1</sup>, Socheata Heng <sup>1</sup>, Siteng Tieng <sup>1</sup>, Ford David <sup>1</sup>, Sarah Dine <sup>2</sup>, Oriana Haddad <sup>2</sup>,  
Christophe Colbeau-Justin <sup>3</sup>, Mamadou Traore <sup>2</sup> and Andrei Kanaev <sup>2,\*</sup>

<sup>1</sup> Department of Chemistry, Royal University of Phnom Penh, Russian Blvd, Phnom Penh, Cambodia; chengkhley@yahoo.com (K.C.); socheataheng3579@gmail.com (S.H.); tiengsiteng@gmail.com (S.T.); forddavidaus@gmail.com (F.D.)

<sup>2</sup> Laboratoire des Sciences des Procédés et des Matériaux, CNRS, Université Sorbonne Paris Nord, 93430 Villetaneuse, France; sarah.dine@lspm.cnrs.fr (S.D.); oriana.haddad@cnrs.fr (O.H.); mamadou.traore@lspm.cnrs.fr (M.T.)

<sup>3</sup> Institut de Chimie Physique, CNRS UMR 8000, Université Paris-Saclay, 91405 Orsay, France; christophe.colbeau-justin@universite-paris-saclay.fr

\* Correspondence: andrei.kanaev@lspm.cnrs.fr

## 1. EDX measurements

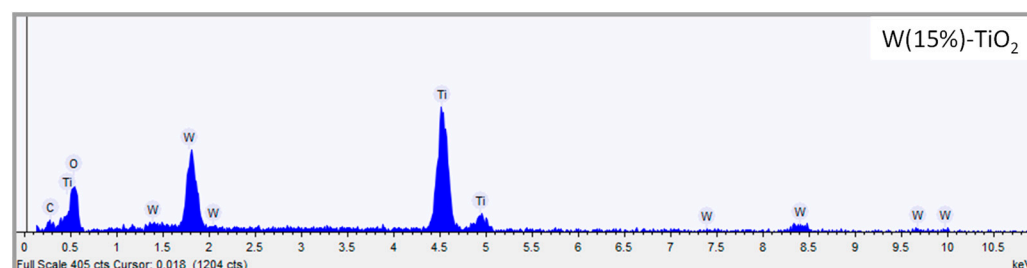

(1) Traces of C are due to supporting tape. No contamination was observed.

**Table S1.** W/Ti elemental composition of selected W(x)-TiO<sub>2</sub> nanopowders calcinated at 550 °C, where  $x = C_W / (C_W + C_{Ti})$ .

| Samples      | W(0.02)-TiO <sub>2</sub> | W(0.04)-TiO <sub>2</sub> | W(0.08)-TiO <sub>2</sub> | W(0.15)-TiO <sub>2</sub> | W(0.30)-TiO <sub>2</sub> |
|--------------|--------------------------|--------------------------|--------------------------|--------------------------|--------------------------|
| W / (W + Ti) | 0.0177                   | 0.0376                   | 0.0863                   | 0.1403                   | 0.3172                   |

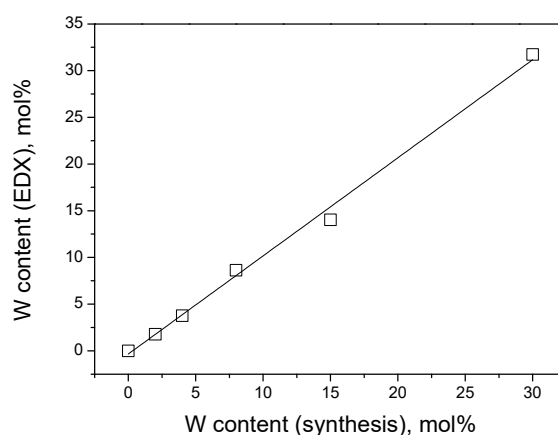

**Figure S1.** W/(W+Ti) composition of W-TiO<sub>2</sub> nanopowders (calcinated at 550 °C).

## 2. BET measurements

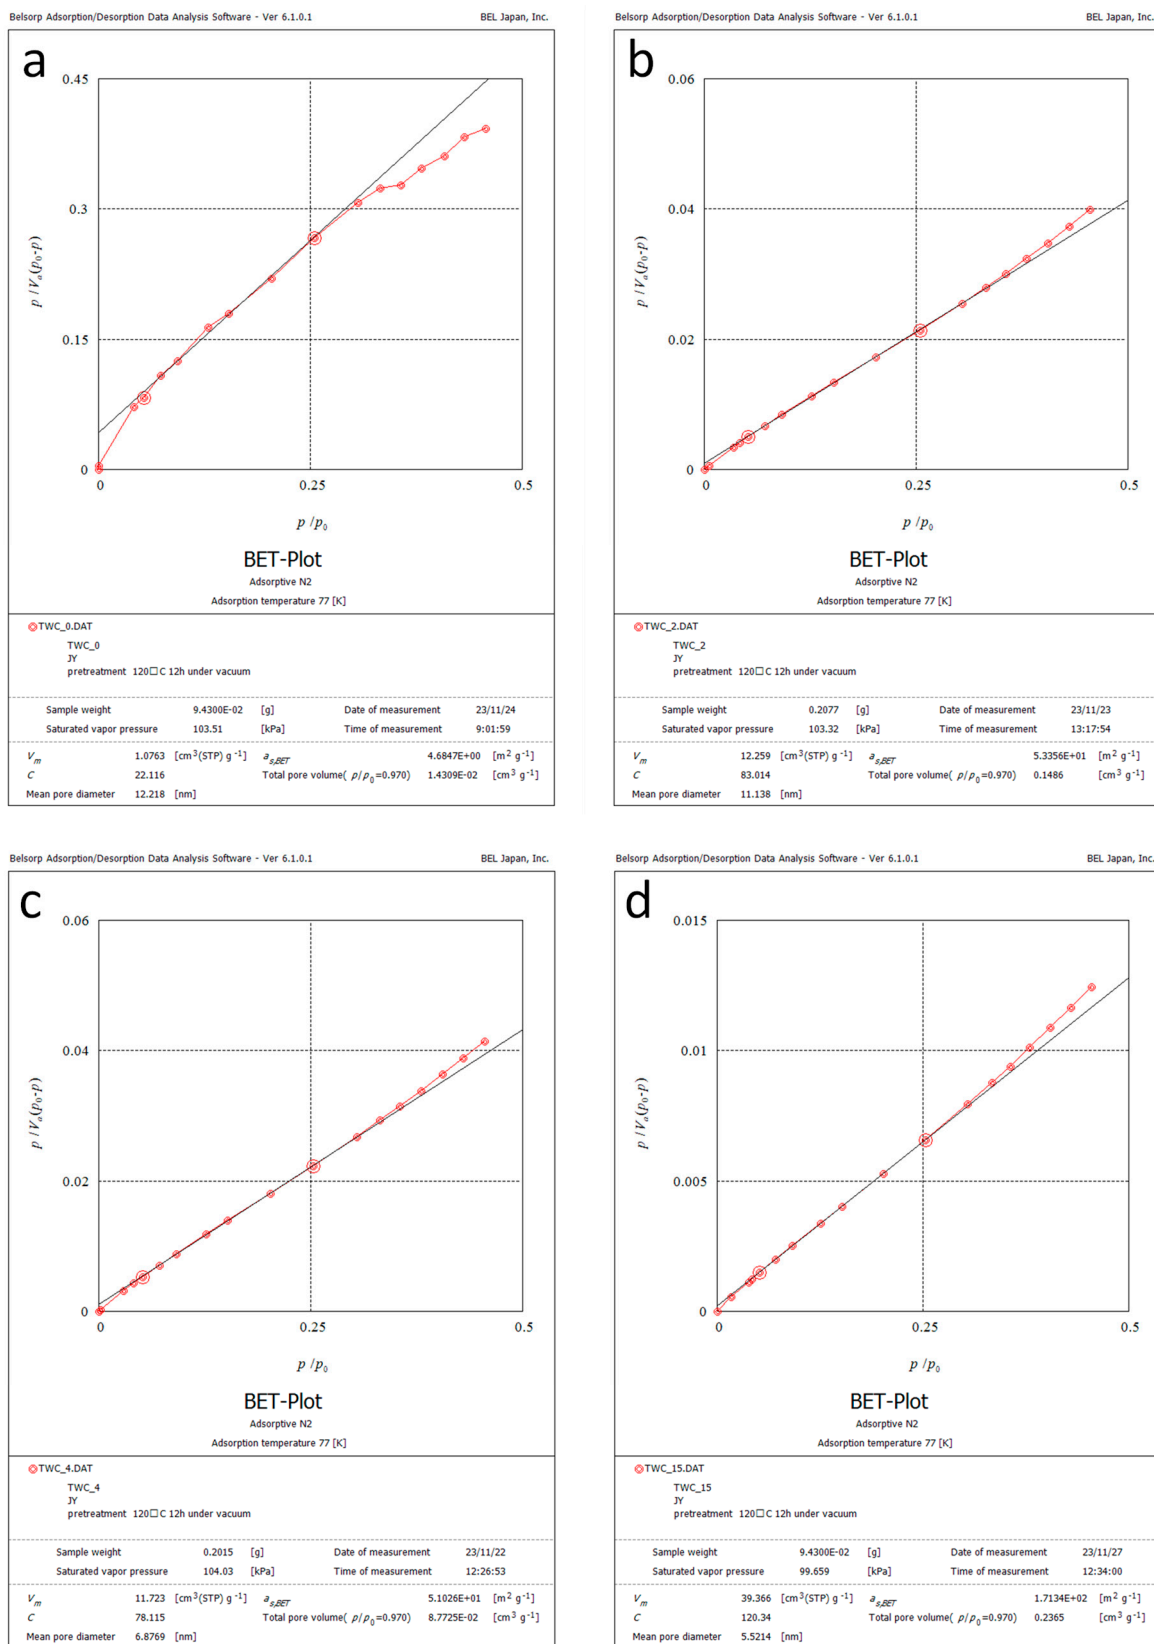

**Figure S2.** BET plots of W-TiO<sub>2</sub> nanopowders (calcinated at 550 °C) with W content of 0 (a), 2 (b), 4 (c) and 15 (d) mol%.

### 3. Kinetics of photocatalytic process

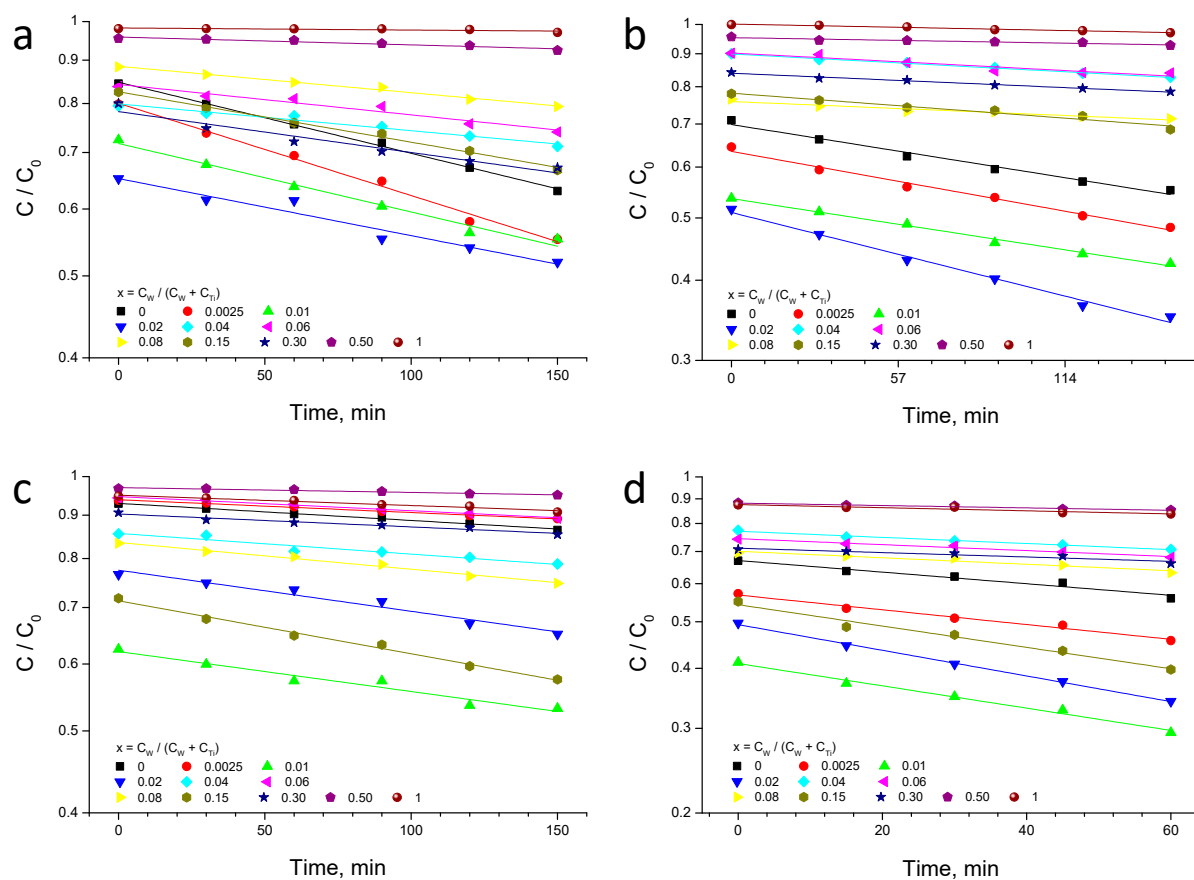

**Figure S3.** Semi-logarithmic plots of MB degradation kinetics using W-TiO<sub>2</sub> photocatalyst ( $C_{catalyst}=0.125$  g/L) under UV-A lamp ( $\lambda=365$  nm) (a-c) and sunlight (d) illuminations. Calcination temperatures are 500 °C (a), 550 °C (b, d), and 600 °C (c). Photocatalysts compositions  $x$  are labeled in inset. Fit of experimental data with first-order process kinetics is shown by solid lines.
